# Supplementary material for: Risk Stratification in Patients with Acute Pulmonary Embolism: Current Evidence and Perspectives
Source: MDPI journal article supplement (doi:10.3390/jcm11092533), 2022-04-30
Supplement: s1 [file s1]

*Review*

# **Risk Stratification in Patients with Acute Pulmonary Embolism: Current evidence and Perspectives**

**Antonio Leidi, Stijn Bex, Marc Righini, Amandine Berner, Olivier Groscurin and Christophe Marti**

## **Supplementary Materials**

Supplementary Table S1. Original and simplified pulmonary embolism severity index (PESI and sPESI)

Supplementary Table S2. The Hestia rule

Supplementary Table S3. Components of several prediction scores

**Supplementary Table S1.** Original and simplified pulmonary embolism severity index (PESI and sPESI).

| Variables                         | PESI         | sPESI     |
|-----------------------------------|--------------|-----------|
| Demographics                      |              |           |
| Age                               | Age in years | +1 if >80 |
| Male gender                       | +10          |           |
| Comorbidities                     |              |           |
| Cancer                            | +30          | +1        |
| Cardiac failure                   | +10          | +1 *      |
| Chronic pulmonary disease         | +10          |           |
| Clinical signs                    |              |           |
| Pulse $\geq 110$ par min.         | +20          | +1        |
| SBP <100 mm Hg                    | +30          | +1        |
| Respiratory rate $\geq 30$ / min. | +20          |           |
| Temperature < 36°C                | +20          |           |
| Confusion                         | +60          |           |
| Oxygen saturation < 90%           | +20          | +1        |

\* 1 point assigned for Cardiac failure OR chronic pulmonary disease. SBP: systolic blood pressure

PESI Class I <66, Class II: 66 to 85, Class III: 86 to 105, Class IV: 106 to 125, Class V >125 pts

sPESI low risk 0 point.

## Supplementary Table S2. The Hestia rule.

### Checklist questions of the Hestia rule

- Is the patient haemodynamically unstable?
  - Is thrombolysis or embolectomy necessary?
  - Active bleeding or high risk of bleeding?
  - More than 24 h of oxygen supply to maintain oxygen saturation >90%?
  - Is pulmonary embolism diagnosed during anticoagulant treatment?
  - Severe pain needing intravenous pain medication for more than 24 h?
  - Medical or social reason for treatment in the hospital for more than 24 h (infection, malignancy, no support system)?
  - Does the patient have a creatinine clearance of <30 mL/min?
  - Does the patient have severe liver impairment?
  - Is the patient pregnant?
  - Does the patient have a documented history of heparin-induced thrombocytopenia?
-

**Supplementary Table S3.** Components of several prediction scores.

| Component                     | Prediction score |      |       |        |
|-------------------------------|------------------|------|-------|--------|
|                               | ESC              | Bova | TELOS | SHIELD |
| Age                           | •                |      |       |        |
| Gender                        | •                |      |       |        |
| Cancer                        | •                |      |       |        |
| Cardiac failure               | •                |      |       |        |
| COPD                          | •                |      |       |        |
| Chronic renal Insufficiency   | •                |      |       |        |
| Cerebrovascular disease       | •                |      |       |        |
| T° < 36                       | •                |      |       |        |
| Shock index                   |                  |      |       | •      |
| Tachypnoea                    | •                |      |       |        |
| Confusion                     | •                |      |       |        |
| BP < 100 mmHg                 | •                | •    |       |        |
| HR >100-110/min               | •                | •    |       |        |
| SaO2 < 90%                    | •                |      |       | •      |
| Cardiac biomarkers            | •                | •    | •     | •      |
| Lactate                       |                  |      | •     | •      |
| Right ventricular dysfunction | •                | •    | •     | •      |
